# Supplementary material for: Magnetic hierarchical porous SiO2 microparticles from droplet microfluidics for water decontamination
Source: Royal Society of Chemistry journal article supplement (doi:10.1039/c9sm02391g), 2020-01-01
Supplement: c9sm02391g1.pdf [file c9sm02391g1.pdf]

Supplementary Material (ESI) for *Soft Matter*

## **Supplementary Information**

### **Magnetic Hierarchical Porous SiO<sub>2</sub> Microparticles from Droplet Microfluidics for Water Decontamination**

Mao-Jie Zhang, Ting Chen, Ping Zhang, Zhi-Lu Li, Li Chen, Yao-Yao Su, Lian-Di Qiu, Gang Peng, Wei Wang,\* and Liang-Yin Chu

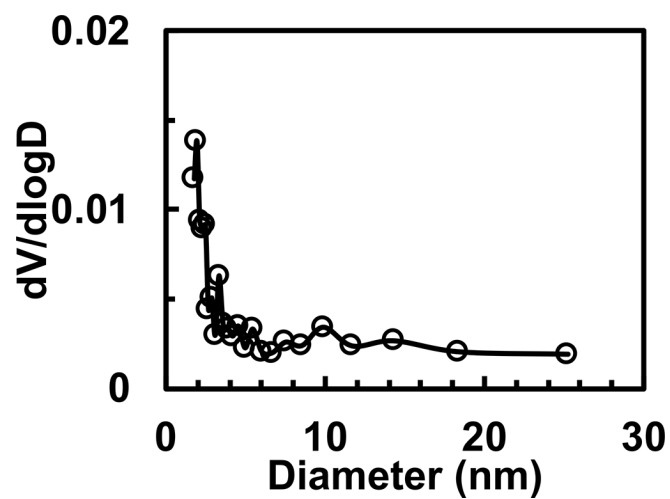

**Figure S1.** Pore size distribution of hierarchical porous SiO<sub>2</sub> microparticles with 40 s homogenization as measured by N<sub>2</sub> adsorption analyzer.

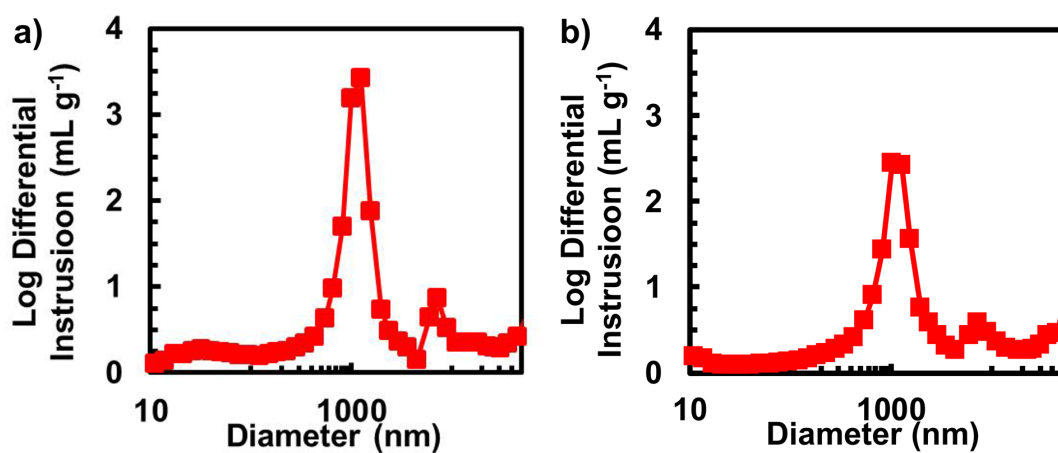

**Figure S2.** Pore size distribution of hierarchical porous SiO<sub>2</sub> microparticles with 40 s (a) and 60 s (b) homogenization. The average pore diameter (4V/A) of hierarchical porous SiO<sub>2</sub> microparticles with 40 s and 60 s homogenization are ~355 nm and ~273 nm, as measured by mercury intrusion porosimetry.

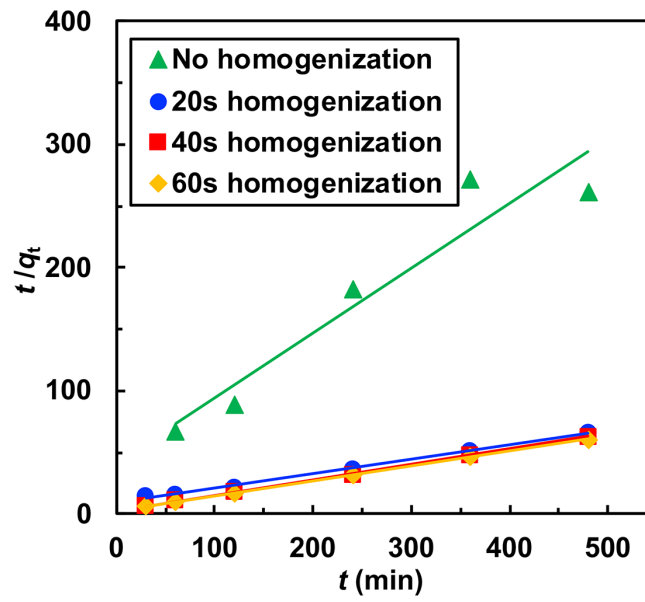

**Figure S3.** Pseudo-second order plot for adsorption of methylene blue by mesoporous SiO<sub>2</sub> microparticles from W/O<sub>2</sub> emulsions (no homogenization) and hierarchical porous SiO<sub>2</sub> microparticles with 20 s, 40 s, and 60 s homogenization.

The equation of pseudo-second order kinetic model can be expressed as follows:

$$\frac{t}{q_t} = \frac{1}{K q_e^2} + \left( \frac{1}{q_e} \right) t$$

where  $K$  is the rate constant ( $\text{g mg}^{-1} \text{ min}^{-1}$ ), and  $q_e$  and  $q_t$  are respectively the amounts of methylene blue adsorbed at equilibrium and at time  $t$ .

**Table S1.** Kinetic parameters for the adsorption of methylene blue.

| Sample *           | $K$ (g mg <sup>-1</sup> min <sup>-1</sup> ) | $q_{e,cal}$ (mg g <sup>-1</sup> ) | $q_{e,exp}$ (mg g <sup>-1</sup> ) | $R^2$  |
|--------------------|---------------------------------------------|-----------------------------------|-----------------------------------|--------|
| No homogenization  | 0.0067                                      | 1.8965                            | 1.8361                            | 0.9087 |
| 20s homogenization | 0.0014                                      | 8.5324                            | 7.2240                            | 0.9970 |
| 40s homogenization | 0.0052                                      | 8.0257                            | 7.5847                            | 0.9996 |
| 60s homogenization | 0.0051                                      | 8.2508                            | 7.8579                            | 0.9996 |

\*Mesoporous SiO<sub>2</sub> microparticles from W/O<sub>2</sub> emulsions (no homogenization) and hierarchical porous SiO<sub>2</sub> microparticles with 20 s, 40 s, and 60 s homogenization are used as samples.

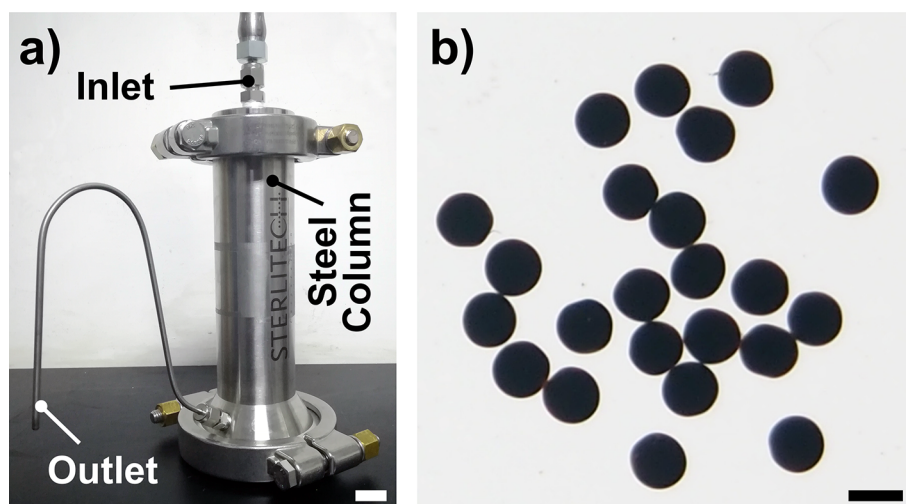

**Figure S4.** Optical images of steel packed column used for packing SiO<sub>2</sub> microparticles (a) and the released SiO<sub>2</sub> microparticles from the steel packed column after pumping water with pressure of 3 MPa (b). Magnetic hierarchical porous SiO<sub>2</sub> microparticles with 40 s homogenization (diameter: 1 mm) were used. Scale bars are 2 cm in (a) and 1 mm in (b).
